# Supplementary material for: Functional assays inDrosophilafacilitate classification of variants of uncertain significance associated with rare diseases
Source: HighWire-hosted journal article supplement (doi:10.1101/gr.278291.123), 2025-06-04
Supplement: Supplemental_Materials_.docx [file Supplemental_Materials_.docx]

**Supplemental Materials**

1. **Supplemental Table 1**

**Supplemental Table 1. List of recent manuscripts that used *Drosophila melanogaster* to address clinically relevant questions.** 212 human genes and 449 variants were studied using flies in 134 manuscripts published over the past ~4.5 years (2020-early 2024). See main text and Figure 1 legend for the method we used to select the papers to include in this analysis. *Clinical Relevance...New Disease Gene, Phenotypic Expansion, VUS Resolution, Known Disease Modeling ***Drosophila* Methods...L: Loss of function, H: Humanization, O: Overexpression, F: Fly analogous variant. ***Muller's Morphs...Amorph, Hypomorph, Hypermorph, Antimorph, Neomorph. Since Amorphic and strong Hypomorphic alleles often behave very similarly in genetic studies, we documented strong LOF alleles as 'amorph or strong hypomorph' when additional molecular/biochemical studies were not conducted.

1. **Supplemental Text**
2. **Ortholog prediction using DIOPT and other methods**

The DIOPT score for each ortholog candidate reflects how many bioinformatic algorithms or databases predicted that a certain gene pair is likely to be orthologous between species. In the latest version (version 9.1), 19 different databases such as OMA (Schneider et al. 2007), Domainoid (Persson et al. 2019), Phylome (Huerta-Cepas et al. 2014), OrthoDB (Kuznetsov et al. 2023), PANTHERanther (Mi et al. 2016) or other methods (e.g. manual curation for gene pairs with very low homology that are not identified as orthologs with current bioinformatic programs) are integrated to predict the potential orthologous relationship between different species. In theory, a high DIOPT score suggests that the two genes are likely to be orthologous with high similarity, while a low score suggests that these genes could be orthologous but may just be homologous genes that share limited sequences or features. While DIOPT can propose ortholog candidate genes, additional informatics analyses using sequence alignment tools such as NCBI BLAST (Camacho et al. 2009) or phylogenetic studies using tools like Clustl Omega (Sievers and Higgens 2021) should be conducted to identify the most likely orthologous gene(s) between the two species.

1. **Navigating FlyBase**

According to FlyBase (https://flybase.org/), ~117,600 mutant alleles have been generated as of July 2024. This includes alleles generated by random mutagenesis approaches such as irradiation (>5,700 alleles e.g. X-ray, gamma-ray), chemical mutagenesis (>21,000 alleles e.g. EMS and ENU), transposon integration (>30,000 alleles such as P-element, PiggyBac, and Minos), and site-specific mutagenesis approaches (>11,000 alleles e.g. Golic method, TALEN, CRISPR). FlyBase is the most comprehensive database of mutant phenotypes and genetic reagents for *Drosophila* research (Öztürk-Çolak et al. 2024). FlyBase also curates gene expression data from variety of sources, including individual research papers (e.g., RNA in situ hybridization, genetic reporters, protein trap lines, antibody staining) as well as high-throughput data based on microarray, bulk RNA-sequencing, and single-cell RNA-sequencing (scRNA-seq). Since each technology has different specificity and sensitivity, integrating information from multiple experimental approaches is recommended to gain a comprehensive view. While navigation of FlyBase may initially be tricky for researchers outside of the fly research field since one needs to be familiar with the genetic and phenotypic nomenclature and different types of tools in *Drosophila* research, mining all available information regarding a fly gene of interest allows experts to effectively select and design a set of appropriate experiments to characterize the function of a human variant of interest.

1. **T2A-GAL4 and Kozak-GAL4 lines**

T2A-GAL4 and Kozak-lines are gene-trap lines that have been generated through recombinase-mediated cassette exchange (RMCE) of transposon insertion lines and CRISPR-mediated homology-directed repair. Over 3,000 T2A/Kozak-GAL4 lines which are available from the Bloomington *Drosophila* Stock Center (BDSC) have been generated through the *Drosophila* Gene Disruption Project (GDP). Most T2A-GAL4 and all Kozak-GAL4 lines function as strong loss-of-function (LOF) alleles that also express the yeast transcriptional activator GAL4 in a spatiotemporal pattern that mimics the expression pattern of the endogenous fly gene. T2A-GAL4 lines are gene trap alleles that carries an artificial exon cassette comprised of an ‘splice acceptor + T2A sequence + GAL4 + transcriptional termination signal sequence’ that is inserted into an intron of the gene of interest flanking two coding exons. Kozak-GAL4 lines replace the entire coding sequence of the gene of interest with a Kozak translation initiation signal followed by the GAL4 protein coding sequence. GAL4 lines can be combined with UAS lines to induce gene expression (Brand and Perrimon 1993). For example, when T2A-GAL4 or Kozak-GAL4 lines are crossed to a UAS-driven fluorescent protein reporter line, the expression pattern of the gene of interest can be discerned by tracking the fluorescence of the reporter protein. Since the GAL4/UAS system functions as an amplifier of gene expression, expression of genes that are expressed at low levels that is below the detection threshold of antibody-based protein expression studies or scRNA-seq methods can be revealed using this system.

1. **Using randomly induced mutants to study gene function in *Drosophila***

Some of the first techniques to proactively generate LOF lines in flies took advantage of the induction of random germline mutations using irradiation and chemical mutagens. These lines were then screened for specific phenotypes the researcher was interested in, mapped to a chromosomal locus using genetic techniques and placed into complementation groups, which correspond to specific genes. Once transposon-based gene manipulation became popularized, this technique was used to generate many lines in which a single transposon interrupts a gene sequence, occasionally functioning as a LOF allele. Imprecise excision of certain transposons such as P-elements can also be leveraged to generate stronger LOF alleles. Many of these fly lines are still publicly available today and have been utilized in human disease studies.

It is important to note that mutant strains that are publicly available or newly generated in individual laboratories may carry second-site mutations, regardless of which technology was used. Fly geneticists often overcome this issue by studying multiple independent mutant alleles and looking for consistent phenotypes. Scientists can also prove specificity by using trans-heterozygous (compound heterozygous) combinations of multiple alleles to neutralize the impact of other random mutations and genetic variants that are present on the same chromosome. Importantly, one should be cautious when a study is performed using a single mutant allele. If only one mutant allele is available, the phenotype of interest must be rescued using a corresponding genomic rescue construct or a cDNA transgenic line to demonstrate specificity.

1. **Benefit and caveats of RNAi and other reverse genetic approaches**

RNAi driven by ubiquitous GAL4 drivers can be used to knock-down the gene in all/most tissues, which could be used to generate a hypomorphic allele. One added advantage of this system is that the level of knock-down can be further modulated by rearing the flies in different temperatures to modulate GAL4 expression/activity (ex. 29°C = higher expression, 18°C = lower expression). One can also restrict RNAi expression to specific developmental stages using temperature- (McGuire et al. 2004) or drug- (Barwell et al. 2017) sensitive GAL80 lines. This versatility and accessibility make RNAi a popular tool in the fly field.

One consideration to make when using RNAi lines is that they can have off-target effects, which may cause unrelated phenotypes that are due to other genes. While publicly available RNAi lines are designed to minimize off-target effects based on the reference genome sequence, unpredicted off-target events may occur due to genetic variations between fly stocks that are used in different laboratories. To obtain reliable results, one should verify that the RNAi is indeed knocking down the gene of interest, either at the transcript level using RT-qPCR or at the protein level using a western blot or immunohistochemistry. It is also important to utilize control RNAi lines (RNAi lines targeting exogenous genes such as Luciferase, GFP, mCherry, LacZ), ideally derived from the same genetic background as the RNAi line that targets the gene of interest. This is especially important when assessing phenotypes such as behavior and longevity that could be influenced by polygenic factors. In addition, multiple independent RNAi lines should be used whenever possible to demonstrate that the phenotype of interest is not caused by off-target effects. More recently, large libraries of guide RNA (gRNA) transgenic lines have been established to perform CRISPR-based conditional knock-out (a.k.a. somatic CRISPR) and knock-down (CRISPRi) studies. Similar consideration needs to be made when utilizing these reagents because inefficient knock-down/out and off-targeting events can occur.

1. **Alternative fly gene ‘humanization’ methods**

Humanization approach combining RNAi (ubiquitous or cell/tissue-specific knock-down) has also been frequently used to assess conservation of gene function and to study variants in coding regions of human genes (Dutta et al. 2022; Vissers et al. 2020; Chung et al. 2020; Aharoni et al. 2022; Gong et al. 2021; Ma et al. 2023; Paul et al. 2022; Wan et al. 2023; Li et al. 2023; Li et al. 2021). Another approach is to attempt to rescue the homozygous/hemizygous null (Li et al. 2021; Huang et al. 2020; Thomas et al. 2022), heterozygous null (Pineda et al. 2021; Lin et al. 2020), or hypomorphic alleles of the fly gene with UAS-human cDNA either ubiquitously or in specific tissues/cells. Such approach was used in a study of SMARCA5 variants (p.R592Q and an in-frame deletion allele) based on rescue of a LOF allele of *Iswi* (ortholog of human *SMARCA5* as well as *SMARCA1*) with ubiquitous and neuron-specific GAL4 drivers (Li et al. 2021). An alternative strategy that has been utilized to humanize fly genes in a tissue-specific manner is by creating mutant clones with the UAS-FRT/FLP system (Stowers and Schwarz 1999) and rescuing a tissue-specific phenotype using UAS-human cDNA. One study mentioned earlier was able to show that morphological defects caused by LOF *drosha* (*DROSHA* ortholog) mutant clones in the fly eye can be rescued by the reference human *DROSHA* cDNA but not by the two disease-associated variants (p.D1219G and p.R1342W) (Barish et al. 2022).

One drawback of the humanization strategy using the UAS/GAL4 system is that the level of human protein expression could be higher than the endogenous level, even when the experiment is conducted at low temperature since binary expression systems can function as an amplifier of transgene expression. Therefore, fly genes that are dosage-sensitive are much more difficult to humanize using this strategy. One alternative strategy that doesn’t utilize the GAL4/UAS binary expression system is to replace the fly gene with a human reference or human variant insert. This way, similar expression levels of the human proteins compared to its fly counterpart could be achieved. Another advantage to this system is the ability to test variants in a heterozygous state or in trans-heterozygous (compound heterozygous) combinations of different alleles. For example, knock-in of human *PNPO* cDNA into the fly *sgll* (*PNPO* ortholog) locus allowed the characterization of three variants in this gene that are associated with epilepsy, one of which (p.R95H) was found to be an antimorphic allele using this assay (Chi et al. 2022). In another study, a rare missense variant (p.P155L) in *TM2D3* associated with late-onset Alzheimer’s disease was found to be deleterious based on rescue of previously isolated fly *amx* (*TM2D3* ortholog) LOF mutants using a genomic rescue construct in which the open reading frame of this single exon fly gene was replaced by the human sequence (Yang et al. 2022; Jakobsdottir et al. 2016).

1. **Additional methods to study the function of VUS in the context of the fly protein**

Similar to the 'humanization approach’ discussed earlier, UAS-fly cDNA transgenic lines can be used to rescue phenotypes induced by mutants or RNAi. Missense variants in *OGDHL* found in individuals with Yoon-Bellen neurodevelopmental syndrome (OMIM #619701) were characterized based on the rescue of homozygous T2A-GAL4 mutants in fly *Ogdh1* (orthologous to *OGDHL* as well as *OGDH*) (Yap et al. 2021). Out of the ten different UAS-fly cDNA transgenic lines (one wild-type and nine patient variants) the authors generated, only the wild-type (reference) allele could rescue the lethality, suggesting all nine variants are LOF alleles. They also conducted cell-type specific rescue experiments in neurons by performing neuron-specific knock-out of *Ogdh1* via somatic CRISPR and further rescuing this with UAS-fly *Ogdh1* transgenes. This assay allowed the authors to conclude that four variants were strong LOF alleles (amorph or strong hypomorphs, since they did not rescue the lethality caused by neuronal knock-out of this gene), whereas the remaining five variants were partial LOF alleles (moderate to weak hypomorphs, because they produced viable flies that show age-dependent bang sensitivity, a seizure-like phenotype). This example also highlights that information about allelic strength can be obtained using experiments performed in *Drosophila*.

UAS-fly cDNAs can also be used to study variants affecting conserved residues based on overexpression experiments (Figure 3C, 4B). For example, the nature and allelic strength of variants in *MAP2K1* (a.k.a. *MEK1*, *MAPKK1*), one of the core components of the mitogen activated protein kinase (MAPK) pathway implicated in RASopathy, have been successfully performed in *Drosophila* using overexpression assays using wild-type or mutant mek (ortholog of *MAP2K1* as well as several other human *MAP2K* genes) in the fly embryo and wing (Jindal et al. 2021). The authors were able to further rank the strength of GOF alleles according to the severity of the fly phenotypes induced by different variants, which is useful for understanding the genotype-phenotype relationship of this disorder in humans. Milder overexpression studies can also be conducted using genomic rescue constructs or via transgenic lines that express the fly cDNA under its endogenous regulatory elements. This approach could be useful for genes and phenotypes that are quite dosage sensitive. Experiments using transgenic lines that express fly cert (CERT1 ortholog) cDNA under its regulatory elements were used to study a missense (p.S132L) variant in human *CERT1* found in a patient with neurodevelopmental phenotypes (Gehin et al. 2023). Animals that express fly *Cert* with the analogous missense (p.S149L) variant had smaller heads, decreased climbing ability, and increased sphingolipid levels compared to flies carrying the wild-type transgene, suggesting that this is a GOF (hypermorphic) allele. This conclusion was validated using cultured human cell-based studies and metabolomic assays, providing in vivo data to support its functional consequence.

**Supplemental References**

Aharoni S, Proskorovski-Ohayon R, Krishnan RK, Yogev Y, Wormser O, Hadar N, Bakhrat A, Alshafee I, Gombosh M, Agam N, et al. 2022. *PSMC1* variant causes a novel neurological syndrome. *Clin Genet* 102:324–32.

Barish S, Senturk M, Schoch K, Minogue AL, Lopergolo D, Fallerini C, Harland J, Seemann JH, Strong N, Kranz PG, et al. 2022. The microRNA processor *DROSHA* is a candidate gene for a severe progressive neurological disorder. *Hum Mol Genet* 31:2934–50.

Barwell T, DeVeale B, Poirier L, Zheng J, Seroude F, Seroude L. 2017. Regulating the UAS/GAL4 system in adult *Drosophila* with Tet-off GAL80 transgenes. *PeerJ* 5:e4167. https://doi.org/10.7717/peerj.4167.

Brand AH, Perrimon N. 1993. Targeted gene expression as a means of altering cell fates and generating dominant phenotypes. *Development* 118:401-15.

Camacho C, Coulouris G, Avagyan V, Ma N, Papadopoulos J, Bealer K, Madden TL. 2009. BLAST+: architecture and applications. *BMC Bioinformatics* 10:421.

Chi W, Iyengar ASR, Fu W, Liu W, Berg AE, Wu C-F, Zhuang X. 2022. *Drosophila* carrying epilepsy-associated variants in the vitamin B6 metabolism gene PNPO display allele- and diet-dependent phenotypes. *Proc Natl Acad Sci USA* 119(9): e2115524119 doi: 10.1073/pnas.2115524119.

Chung H-L, Mao X, Wang H, Park Y-J, Marcogliese PC, Rosenfeld JA, Burrage LC, Liu P, Murdock DR, Yamamoto S, et al. 2020. *De Novo* Variants in *CDK19* Are Associated with a Syndrome Involving Intellectual Disability and Epileptic Encephalopathy. *Am J Hum Genet* 106:717–25.

Dutta D, Briere LC, Kanca O, Marcogliese PC, Walker MA, High FA, Vanderver A, Krier J, Carmichael N, Callahan C, et al. 2020. *De novo* mutations in TOMM70, a receptor of the mitochondrial import translocase, cause neurological impairment. *Hum Mol Genet* 29:1568–79.

Gehin C, Lone MA, Lee W, Capolupo L, Ho S, Adeyemi AM, Gerkes EH, Stegmann APA, Lopex-Martin E, Bermejo-Sanchez E, et al. 2023. *CERT1* mutations perturb human development by disrupting sphingolipid homeostasis. *J Clin Invest* 133(10):e165019 doi: 10.1172/JCI165019.

Gong NN, Dilley LC, Williams CE, Moscato EH, Szuperak M, Wang Q, Jensen M, Girirajan S, Tan TY, Deardorff MA, et al. 2021. The chromatin remodeler ISWI acts during *Drosophila* development to regulate adult sleep. *Sci Adv* 7(8) doi: 10.1126/sciadv.abe2597.

Huang Y, Mao X, van Jaarsveld RH, Shu L, Terhal PA, Jia Z, Xi H, Peng Y, Yan H, Yuan S, et al. 2020. Variants in CAPZA2, a member of an F-actin capping complex, cause intellectual disability and developmental delay. *Hum Mol Genet* 29(9):1537–46.

Huerta-Cepas J, Capella-Gutiérrez S, Pryszcz LP, Marcet-Houben M, Gabaldón T. 2014. PhylomeDB v4: zooming into the plurality of evolutionary histories of a genome. *Nucleic Acids Res* 42:D897-902.

Jakobsdottir J, van der Lee SJ, Bis JC, Chouraki V, Li-Kroeger D, Yamamoto S, Grove ML, Naj A, Vronskaya M, et al. 2016. Rare Functional Variant in TM2D3 is Associated with Late-Onset Alzheimer's Disease. *PLoS Genet.* 12(10):e1006327 doi: 10.1371/journal.pgen.1006327.

Jindal GA, Goyal Y, Yamaya K, Futran AS, Kountouridis I, Balgobin CA, Schupbach T, Burdine RD, Shvartsman SY. 2017. In vivo severity ranking of Ras pathway mutations associated with developmental disorders. *Proc Natl Acad Sci USA* 114:510–5.

Kuznetsov D, Tegenfeldt F, Manni M, Seppey M, Berkley M, Kriventseva EV, Zdobnov EM. 2023. OrthoDB v11: annotation of orthologs in the widest sampling of organismal diversity. *Nucleic Acids Res* 51:D445-51.

Li D, Wang Q, Gong NN, Kurolap A, Feldman HB, Boy N, Brugger M, Grand K, McWalter K, Sacoto MJG, et al. 2021. Pathogenic variants in *SMARCA5*, a chromatin remodeler, cause a range of syndromic neurodevelopmental features. *Sci Adv* 7(20):eabf2066 doi: 10.1126/sciadv.abf2066.

Li J, Zheng H, Hou J, Chen J, Zhang F, Yang X, Jin G, Zi Y. 2023. X-linked *RBBP7* mutation causes maturation arrest and testicular tumors. *J Clin Invest* 133(20):e171541 doi: 10.1172/JCI171541.

Lin C-H, Tsai P-I, Lin H-Y, Hattori N, Funayama M, Jeon B, Sato K, Abe K, Mukai Y, Takahashi Y, et al. 2020. Mitochondrial *UQCRC1* mutations cause autosomal dominant parkinsonism with polyneuropathy. *Brain* 143(11):3352–73.

Ma M, Zhang X, Zheng Y, Lu S, Pan X, Mao X, Pan H, Chung H-l, Wang H, Guo H, et al. 2023. The fly homolog of *SUPT16H*, a gene associated with neurodevelopmental disorders, is required in a cell-autonomous fashion for cell survival. *Hum Mol Genet* 32(6):984–97.

McGuire SE, Mao Z, Davis RL. 2004. Spatiotemporal gene expression targeting with the TARGET and gene-switch systems in *Drosophila*. *Sci STKE* 2004(220):p16.

Mi H, Poudel S, Muruganujan A, Casagrande JT, Thomas PD. 2016. PANTHER version 10: expanded protein families and functions, and analysis tools. *Nucleic Acids Res* 44:D336-42.

Öztürk-Çolak A, Marygold SJ, Antonazzo G, Attrill H, Goutte-Gattat D, Jenkins VK, Matthews BB, Millburn G, Santos GD, Tabone CJ, et al. 2024. FlyBase: updates to the *Drosophila* genes and genomes database. *Genetics* 227(1) doi: 10.1093/genetics/iyad211.

Paul MM, Dannhäuser S, Morris L, Mrestani A, Hübsch M, Gehring J, Hatzopoulos GN, Pauli M, Auger GM, Bornschein G, et al. 2022. The human cognition-enhancing *CORD7* mutation increases active zone number and synaptic release. *Brain* 145(11):3787–802.

Persson E, Kaduk M, Forslund SK, Sonnhammer ELL. 2019. Domainoid: domain-oriented orthology inference. *BMC Bioinformatics* 20:523 doi: 10.1186/s12859-019-3137-2.

Pineda S, Nikolova-Krstevski V, Leimena C, Atkinson AJ, Altekoester A-K, Cox CD, Jacoby A, Huttner IG, Ju Y-K, Soka M, et al. Conserved Role of the Large Conductance Calcium-Activated Potassium Channel, KCa1.1, in Sinus Node Function and Arrhythmia Risk. *Circ Genom Precis Med* 14:e003144 doi: 10.1161/CIRCGEN.120.003144.

Schneider A, Dessimoz V, Gonnet GH. 2007. OMA Browser--exploring orthologous relations across 352 complete genomes. *Bioinformatics* 23:2180-2.

Sievers F, Higgins DG. 2021. The clustal omega multiple alignment package. *Methods Mol Biol* 2231:3-16.

Stowers RS, Schwarz TL. 1999. A genetic method for generating *Drosophila* eyes composed exclusively of mitotic clones of a single genotype. *Genetics* 152:1631–9.

Thomas AX, Link N, Robak LA, Demmler-Harrison G, Pao EC, Squire AE, Michels S, Cohen JS, Comi A, Prontera P, et al. 2022. *ANKLE2*-related microcephaly: A variable microcephaly syndrome resembling Zika infection. *Ann Clin Transl Neurol* 9(8):1276–88.

Vissers LELM, Kalvakuri S, de Boer E, Geuer S, Oud M, van Outersterp I, Kwint M, Witmond M, Kersten S, Polla DL, et al. 2020. *De Novo* Variants in *CNOT1*, a Central Component of the CCR4-NOT Complex Involved in Gene Expression and RNA and Protein Stability, Cause Neurodevelopmental Delay. *Am J Hum Genet* 107:164–72.

Wan R-P, Liu Z-G, Huang X-F, Kwan P, Li Y-P, Qu X-C, Ye X-G, Chen F-Y, Zhang D-W, He M-F, et al. 2023. *YWHAZ* variation causes intellectual disability and global developmental delay with brain malformation. *Hum Mol Genet* 32(3):462–72.

Yang S-A, Salazar JL, Li-Kroeger D, Yamamoto S. 2022. Functional Studies of Genetic Variants Associated with Human Diseases in Notch Signaling-Related Genes Using *Drosophila*. *Methods Mol Biol* 2472:235–76.

Yap ZY, Efthymiou S, Seiffert S, Vargas Parra K, Lee S, Nasca A, Maroofian R, Schrauwen I, Pendziwiat M, Jung S, et al. 2021. Bi-allelic variants in *OGDHL* cause a neurodevelopmental spectrum disease featuring epilepsy, hearing loss, visual impairment, and ataxia. *Am J Hum Genet* 108(12):2368–84.
