# Supplementary material for: Functional assays inDrosophilafacilitate classification of variants of uncertain significance associated with rare diseases
Source: HighWire-hosted journal article supplement (doi:10.1101/gr.278291.123), 2025-06-04
Supplement: Supplemental_Table_S1_.xlsx [file Supplemental_Table_S1_.xlsx]

## Sheet: Supplemental Table1
Year	Journal	Human Gene(s)	DIOPT Score (v9, max score:19)	Clinical Relevance*	Drosophila Methods**	Level of Analysis (Gene or Variant)	Variant classification into LOF or GOF	Variant Classification into Muller's Morphs***	# and Identity of Variants Studied in Flies	PMID
2023	Communications Biology	ACO2	15	Phenotypic Expansion	L, F	Variant	LOF	hypomorph	1 (p.A252T)	38007539
2020	Neuron	ACOX1	16	Phenotypic Expansion	L, H, O, F	Variant	GOF	hypermorph	1 (p.N237S)	32169171
2022	Kidney International Reports	ACTN4	13	VUS Resolution	L, H	Variant	LOF	amorph or strong hypomorph	3 (p.W59R, p.M240T, p.K255E)	36815115
2022	Clinical Genetics	ADD3	12	Known Disease Modeling	L, O	Gene	N/A	N/A	N/A	36046955
2023	Disease Models and Mechanisms	AGAP1	16	Phenotypic Expansion	L	Gene	N/A	N/A	N/A	37470098
2022	Disease Models and Mechanisms	ALK	14	Known Disease Modeling	L, O, F	Variant	GOF	hypermorph	2 (p.F1174L, p.Y1278S)	35972154
2022	Annals of Clinical and Translational Neurology	ANKLE2	11	VUS Resolution	L, H	Variant	LOF	hypomorph	4 (p.V229G, p.R236*, p.R536C, c.1421‐1G>C)	35871307
2022	Kidney International Reports	APOL1	0	Known Disease Modeling	O	Variant	GOF	unclassified GOF	2 (p.S342G/I384M, p.N388del/Y389del)	35120995
2023	Disease Models and Mechanisms	APOL1	0	Known Disease Modeling	O	Variant	GOF	unclassified GOF	2 (p.S342G/I384M, p.N388del/Y389del)	37969018
2021	Journal of Medical Genetics	APOO	9	New Disease Gene	L	Gene	N/A	N/A	N/A	32439808
2021	Human Molecular Genetics	ARF3	11	New Disease Gene	O	Variant	GOF	some antimorph, some hypermorph	2 (p.D67V, R99L)	34346499
2021	Genome Medicine	ATAD3A	16	Phenotypic Expansion	L, F	Variant	LOF	some amorph, some hypomorph	6 (p.L77V, p.F50L, p.R170W, p.G236V, p.K568del, p.R327P)	33845882
2022	Movement Disorders	ATP5MC3	13	New Disease Gene	F	Variant	GOF	antimorph	1 (p.N106K)	34636445
2021	Neurobiology of Disease	ATP7A	15	Phenotypic Expansion	L, O, F	Variant	LOF	hypomorph	1 (p.M1311V)	33359139
2021	American Journal of Human Genetics	BCAS3	15	New Disease Gene	L	Gene	N/A	N/A	N/A	34022130
2020	American Journal of Human Genetics	BICRA	4	New Disease Gene	L	Gene	N/A	N/A	N/A	33232675
2020	Human Molecular Genetics	CAPZA2	16	New Disease Gene	H, O, L	Variant	LOF	hypomorph	2 (p.K256E, p.R259L)	32338762
2021	Cancers	CDH1	4	VUS Resolution	O	Variant	GOF	antimorph	1 (p.G212E)	34503169
2020	American Journal of Human Genetics	CDK19	14	New Disease Gene	L, H	Variant	LOF	amorph or strong hypomorph	2 (p.Y32H, p.T196A)	32330417
2023	The Journal of Clinical Investigation	CERT1	14	Phenotypic Expansion	F	Variant	GOF	hypermorph	1 (p.S132L)	36976648
2020	Developmental Neurobiology	CHMP2B	16	Known Disease Modeling	O	Variant	GOF	unclassified GOF	1 (intron 5 retention)	31587468
2020	American Journal of Human Genetics	CNOT1	15	New Disease Gene	L, H	Variant	LOF	unclassified LOF	9 (p.Q33*, p.Y396*, p.R535C, p.Q642E, p.R900C, p.L1148P, p.K1241R, p.R1478C, p.N2216S)	32553196
2022	Brain	CORD7	12	VUS resolution	L, F	Variant	GOF	hypermorph	1 (p.R844H)	35022694
2024	Biological Psychiatry	CYFIP1	15	New Disease Gene	F	Variant	LOF	hypomorph	2 (p.I476V, p.P742L)	37704042
2023	European Journal of Medical Genetics	DHX9	17	New Disease Gene	O	Variant	LOF	hypomorph	2 (p.G414R, p.R1052Q)	37369308
2023	The Journal of Clinical Endocrinology & Metabolism	DIS3	16	New Disease Gene	L	Gene	N/A	N/A	N/A	36869713
2023	American Journal of Human Genetics	DOT1L	15	New Disease Gene	L, H	Variant	GOF	hypermorph	7 (p.C45G, p.T100M, p.E123K, p.E129K, p.R292C, p.L626V, ,p.K1025M)	37827158
2022	Human Molecular Genetics	DROSHA	16	New Disease Gene	L, H, F	Variant	LOF	hypomorph	2 (p.D1084G, p.R1210W)	35405010
2020	Scientific Report	DRYK1A	12	VUS Resolution	F	Variant	LOF	amorph or strong hypomorph	1 (p.E396X)	32555303
2023	Disease Models and Mechanisms	DVL1	13	Known Disease Modeling	O	Variant	Mixed (GOF/LOF)	GOF of non-canonical Wnt signaling and LOF of canonical Wnt signaling	1 (p.1519ΔA, p.1529ΔA, p.1615ΔA)	36916233
2022	Annuls of Neurology	EBF3	15	VUS Resolution	L, H	Variant	LOF	some amorph or strong hypomorph, some hypomorph	4 (p.R163Q, p.R163L, p.G171D, p.R209W)	35340043
2023	American Journal of Human Genetics	EIF4A2	14	New Disease Gene	L, H	Variant	Some GOF, some LOF	some unclassified GOF, some hypomorph	4 (p.T216I, p.T243I, p.L344F, p.G364E)	36528028
2021	Nature Communications	EIF6	16	New Disease Gene	L, F	Variant	Other	other (intragenic suppressor)	3 (p.R61L, p.R96W, p.N106S)	34413298
2021	Disease Models and Mechanisms	ELAC2	17	Known Disease Modeling	L, H, O, F	Variant	LOF	hypomorph	2 (p.F154L, p.T520I)	34338278
2022	Human Molecular Genetics	EMC1	16	Phenotypic Expansion	L, H, O, F	Variant	LOF	hypomorph	3 (p.P582H, p.P582R, p.P584H)	35234901
2023	Genetics	EZH1	13	New Disease Gene	L, F	Variant	GOF	hypermorph	1 (p.A678G)	37314226
2021	Nucleic Acids Research	FARS2	17	Known Disease Modeling	L, H	Variant	LOF	hypomorph	2 (p.D142Y, p.G309S)	34878141
2022	American Journal of Human Genetics	FBXW7	10	New Disease Gene	L	Gene	N/A	N/A	N/A	35395208
2023	Life Science Alliance	FGF12	5	Phenotypic Expansion	F	Variant	LOF	amorph or strong hypomorph	1 (p.E87K)	37286232
2021	Journal of Molecular Neuroscience	FHL1	4	VUS Resolution	O	Variant	GOF	neomorph	1 (p.C150Y)	33515430
2022	American Journal of Human Genetics	FRMD5	14	New Disease Gene	L, H, O, F	Variant	Some GOF, Some LOF	some antimorph, some hypomorph	6 (p.F114L, p.S351G, p.S351R, p.C352R, p.S349R, p.Y546C)	36206744
2024	American Journal of Human Genetics	FRYL	15	New Disease Gene	L, F	Variant	LOF	some amorph or strong hypomorph, some hypomorph	4 (p.F1628L, p.F2295S, p.S2397I, p.Y2951C)	38479391
2023	Life Science Alliance	FTSJ1	18	Known Disease Modeling	L	Gene	N/A	N/A	N/A	36720500
2022	Brain	FZR1	17	Phenotypic Expansion	L, F	Variant	LOF	hypomorph	2 (p.D187N, p.D333K)	34788397
2021	Genetics in Medicine	GDF11	9	Phenotypic Expansion	F	Variant	LOF	some amorph, some hypomorph	3 (p.R295P, p.E306K, p.Y336*)	34113007
2022	Human Genetics	GRIA3	15	Phenotypic Expansion	O, F	Variant	GOF	hypermorph	1 (p.A615V)	35031858
2023	American Journal of Human Genetics	INTS11	16	New Disease Gene	L, H, F	Variant	LOF	some amorph or strong hypomorph, some hypomorph	7 (p.R23L, p.G61S, p.L144F, p.K402E, p.H420Y, p.V521M, p.V557E)	37054711
2021	American Journal of Human Genetics	JAG2	13	New Disease Gene	L	Gene	N/A	N/A	N/A	33861953
2021	Circulation: Genomic and Precision Medicine	KCNMA1	15	VUS Resolution	L, H, O	Variant	GOF	unclassified GOF	1 (p.S11_S12delinsG)	33629867
2023	American Journal of Human Genetics	KDM6B	11	Phenotypic Expansion	L, O	Variant	LOF	some amorph or strong hypomorph, some hypomorph	18 (see manuscript)	37196654
2024	MedComm	KIF5C	14	Phenotypic Expansion	F	Variant	GOF	antimorph	1 (p.S90del)	38525108
2021	Cells	LRRK2	7	VUS Resolution	O	Variant	Other	other (intragenic suppressor)	3 (p.N551K, R1398H, G2019S)	33466414
2023	Journal of Medical Genetics	MAB21L1	15	VUS Resolution	F	Variant	GOF	antimorph	1 (p.F52L)	36446583
2020	Neurobiology of Disease	MAPT	5	Known Disease Modeling	O	Variant	GOF	neomorph	1 (p.G273R)	32961270
2021	Molecular Biology of the Cell	MEK1	17	VUS Resolution	O	Variant	GOF	hypermorph	3 (p.F53S, p.Y130C, p.E203K)	33476180
2023	Proceedings of the National Academy of Sciences	MEK1	17	VUS Resolution	F	Variant	GOF	hypermorph	3 (p.F53Y, p.Q56P, p.G128D)	37579140
2023	Human Genetics	MRPL50	11	New Disease Gene	L	Gene	N/A	N/A	N/A	37148394
2023	Genetics in Medicine	MRTFB	9	New Disease Gene	L, O	Variant	GOF	hypermorph	3 (p.N95S, p.R104G, p.R109Q)	37013900
2022	Human Molecular Genetics	MTCH2	17	New Disease Gene	L	Gene	N/A	N/A	N/A	35904451
2022	American Journal of Human Genetics	MTSS2	7	New Disease Gene	L, H, O	Variant	GOF	antimorph	1 (p.R671W)	36067766
2020	Skeletal Muscle	MYH3	11	Known Disease Modeling	F	Variant	LOF	unclassified LOF	2 (p.A234T, p.F437I)	32799913
2020	Plos Genetics	MYL2	7	VUS Resolution	L, H	Variant	LOF	amorph or strong hypomorph	2 (p.P144Rfs*57, p.G162R)	32453731
2020	Disease Models and Mechanisms	MYOM2	1	New Disease Gene	L	Gene	N/A	N/A	N/A	33033063
2022	The Cerebellum	NAV2	11	New Disease Gene	L	Gene	N/A	N/A	N/A	35218524
2021	American Journal of Medical Genetics A	NFIA	14	Phenotypic Expansion	O	Variant	LOF	amorph or strong hypomorph	1 (p.K125E)	33973697
2023	Disease Models and Mechanisms	NKX2.5	5	VUS Resolution	F	Variant	LOF	hypomorph	1 (p.K158N)	37691628
2023	Scientific Report	NONO	13	VUS Resolution	O, F	Variant	LOF	hypomorph	1 (p.P459A)	36653413
2021	Journal of Psychiatric Research	NRXN1	14	VUS Resolution	O	Variant	LOF	hypomorph	3 (p.Y282H, p.L893V, p.I1135V)	34487988
2022	Human Molecular Genetics	NRXN1	14	Known Disease Modeling	L	Gene	N/A	N/A	N/A	35617143
2023	Genetics in Medicine	NSUN6	16	New Disease Gene	L	Gene	N/A	N/A	N/A	37226891
2020	American Journal of Human Genetics	NUP188	14	New Disease Gene	L	Gene	N/A	N/A	N/A	32275884
2024	Molecular Neurobiology	NUS1	14	Phenotypic Expansion	L, F	Variant	LOF	hypomorph	1 (p.R290C)	38520610
2020	Journal of Inherited Metabolic Disease	OGDH	17	New Disease Gene	L, H, F	Variant	LOF	amorph or strong hypomorph	1 (p.N320S)	32383294
2022	Genetics in Medicine	OGDH	17	VUS Resolution	L, F	Variant	LOF	some amorph or strong hypomorph, some hypomorph	2 (p.P189L, p.S297Y)	36520152
2021	American Journal of Human Genetics	OGDHL	16	New Disease Gene	L, F	Variant	LOF	some amorph or strong hypomorph, some hypomorph	9 (p.W220C, p.R244W, p.R299G, p.A327V, p.D491V, p.R673Q, p.F734S, p.S778K, p.P852A)	34800363
2020	G3: Genes, Genomes, Genetics	PDCD2L	15	New Disease Gene	L	Gene	N/A	N/A	N/A	33055224
2022	Proceedings of the National Academy of Sciences	PNPO	15	Known Disease Modeling	L, H	Variant	Some GOF, Some LOF	spme antimorph, some hypomorph	3 (p.D33V, p.R95H, p.R116Q)	35217610
2020	Acta Neuropathologica	POGLUT1	17	Phenotypic Expansion	L, H	Variant	LOF	hypomorph	5 (p.Y57C, C102F, I129T, R183W, D223E)	31897643
2024	American Journal of Human Genetics	PPFIA3	13	New Disease Gene	L, H, O	Variant	Some GOF, some LOF	some antimorph, some hypomorph	5 (p.R39C, p.A315S, p.R415W, p.W546C, p.R784W)	38181735
2021	Brain	PRDX3	15	Phenotypic Expansion	L	Gene	N/A	N/A	N/A	33889951
2020	Disease Models and Mechanisms	PRPF8	17	Known Disease Modeling	F	Variant	GOF	antimorph	9 (p.S2178F, p,P2361T, p.H2369P, p.H2369R, p.R2370G, p.R2370K, p.R2370S, p.2374L, p.Y2395N)	32424050
2022	Clinical Genetics	PSMC1	16	New Disease Gene	L, H	Variant	LOF	hypomorph	1 (p.I255T)	35861243
2023	Science Translational Medicine	PSMC3	15	Phenotypic Expansion	L	Gene	N/A	N/A	N/A	37256937
2021	Plos Genetics	PTEN	15	VUS Resolution	L, H, O	Variant	Some GOF, Some LOF	some hypermorph, some amorph or strong hypomorph, some hypomorph	95 (see manuscript)	34492006
2023	Brain	PTPA	17	New Disease Gene	L	Gene	N/A	N/A	N/A	36073231
2022	Brain	RAC1	14	Phenotypic Expansion	L, F	Variant	GOF	hypermorph	1 (p.Y64D)	35139179
2022	American Journal of Human Genetics	RBBP7	12	New Disease Gene	L	Gene	N/A	N/A	N/A	35809576
2023	The Journal of Clinical Investigation	RBBP7	12	VUS Resolution	L, H	Variant	LOF	amorph or strong hypomorph	1 (p.W401Mfs*5)	37843278
2021	Human Molecular Genetics	RNF2	15	New Disease Gene	L, F	Variant	LOF	some amorph or strong hypomorph, some hypomorph	2 (p.R70H, p.S82R)	33864376
2023	HGG Advances	RNF212B	10	New Disease Gene	L	Gene	N/A	N/A	N/A	37124137
2021	Brain	RNF220	15	New Disease Gene	L	Gene	N/A	N/A	N/A	33964137
2022	Human Molecular Genetics	ROBO1	10	Phenotypic Expansion	L, H, O, F	Variant	Some GOF, Some LOF	some neomorph, some hypomorph	2 (p.D422G, p.S1522L)	35348658
2023	Nature Communications	SART3	13	New Disease Gene	L	Gene	N/A	N/A	N/A	37296101
2020	American Journal of Human Genetics	SCAF4	10	New Disease Gene	L	Gene	N/A	N/A	N/A	32730804
2020	Journal of Medical Genetics	SCAMP5	8	New Disease Gene	L, F	Variant	GOF	antimorph	1 (p.G80W)	31439720
2021	Journal of Medical Genetics	SCAPER	16	Phenotypic Expansion	L	Gene	N/A	N/A	N/A	32527956
2020	Molecular Psychiatry	SETD1A	12	Phenotypic Expansion	L	Gene	N/A	N/A	N/A	32346159
2024	Genetics	SETD2	13	VUS Resolution	L, F	Variant	LOF	hypomorph	1 (p.E902Q)	38290049
2023	Journal of Human Genetics	SLC5A6	14	VUS Resolution	L, H, F	Variant	LOF	amorph or hypomorph	1 (p.S74F)	38012394
2023	Frontiers in Neuroscience	SLC6A1	16	Known Disease Modeling	O	Variant	GOF	antimorph	1 (p.A288V)	36741049
2021	JCI Insight	SLC6A3	13	Phenotypic Expansion	O	Variant	GOF	antimorph	1 (p.K619N)	34375312
2021	Science Advances	SMARCA5	14	New Disease Gene	L, H	Variant	LOF	some amorph or strong hypomorph, some hypomorph	2 (p.R592Q, p.del268-319)	33980485
2020	Disease Models and Mechanisms	SMN1	14	VUS Resolution	F	Variant	LOF	hypomorph	10 (p.D20V, F70S, V72G, G73R, I93F, Y107C, T205I, Y208C, G210C, G210V)	32501283
2023	npj Parkinson's Disease	SNCA	0	VUS Resolution	O	Variant	GOF	neomorph	1 (p.V15A)	37903765
2024	Brain	SNUPN	11	New Disease Gene	L	Gene	N/A	N/A	N/A	38366623
2020	Nature Genetics	SORD	17	New Disease Gene	L	Gene	N/A	N/A	N/A	32367058
2023	Brain	SPTSSA	8	New Disease Gene	O	Variant	GOF	hypermorph	1 (p.T51I)	36718090
2023	American Journal of Human Genetics	SRSF1	15	New Disease Gene	O	Variant	LOF	hypomorph	7 (p.P24L, p.G40V, p.D44N, p.A70T, p.L84R, p.V160M, p.H183R, p.V194Serfs∗2)	37071997
2023	Human Molecular Genetics	SUPT16H	16	New Disease Gene	L, H, O	Variant	LOF	hypomorph	2 (p.T171I, p.G808R)	36255738
2023	Acta Neuropathologica	TARDBP	15	Phenotypic Expansion	L, H, O	Variant	LOF	hypomorph	1 (p.W385Ifs*10)	37000196
2022	American Journal of Human Genetics	TIAM1	12	New Disease Gene	L, H, O	Variant	LOF	hypomorph	3 (p.R23C, p.G328V, p.L862F)	35240055
2022	Methods in Molecular Biology	TM2D3	14	VUS Resolution	H	Variant	LOF	amorph or strong hypomorph	1 (p.P155L)	35674905
2022	Cellular and Molecular Life Sciences	TMEM43	17	Known Disease Modeling	L, O	Variant	GOF	unclassified GOF	1 (p.S358L)	35869176
2023	American Journal of Human Genetics	TMEM63B	14	New Disease Gene	O	Variant	GOF	unclassified GOF	2 (p.V44M, p.G580C)	37421948
2021	American Journal of Human Genetics	TNPO2	14	New Disease Gene	L, H, O	Variant	Some GOF, Some LOF, some Mixed (GOF/LOF)	some hypomorph, some unclassified GOF, some mixed	6 (.Q28R, p.D156N, p.W370R, p.W370C, p.A546V, p.W727C)	34314705
2020	Human Molecular Genetics	TOMM70	17	New Disease Gene	L, H, O	Variant	LOF	hypomorph	2 (p.I554F, p.T607I)	32356556
2022	The Journal of Clinical Investigation Insight	TPM2	13	Known Disease Modeling	O, F	Variant	GOF	unclassified GOF	8 (p.K7del, p.E41K, p.K49del, p.R91G, p.E122K, p.R133P, p.R133W, N202K)	35579956
2024	Brain	TRAPPC6B	17	Phenotypic Expansion	L	Gene	N/A	N/A	N/A	37713627
2023	eLife	UBA5	17	VUS Resolution	L, H	Variant	LOF	some amorph or strong hypomorph, some hypomorph	12 (see manuscript)	38079206
2023	Brain	UNC13B	11	New Disease Gene	L	Gene	N/A	N/A	N/A	33876820
2023	Genetics in Medicine	UNC79	18	New Disease Gene	L	Gene	N/A	N/A	N/A	37183800
2020	Brain	UQCRC1	11	New Disease Gene	L, H	Variant	GOF	antimorph	1 (p.Y314S)	33141179
2021	Disease Models and Mechanisms	VCP	17	Known Disease Modeling	F	Variant	Unclassified	other (variants had functional consequences but were unclassified)	9 (p.P137L, p.R155H, p.R155C, p.G157R, p.R159C, p.R191Q, p.L198W, p.T262A, p.A439S)	34160014
2023	HGG Advances	WDR5	16	New Disease Gene	L, O	Variant	GOF	unclassified GOF	6 (p.A169P, p.R196C, p.A201V, p.T208M, p.D213N, p.K245R)	36408368
2024	Genetics in Medicine	YKT6	16	New Disease Gene	L, F	Variant	LOF	hypomorph	2 (p.Y64C, p.Y185C)	38522068
2020	Disease Models and Mechanisms	YPEL3	14	New Disease Gene	L, F	Variant	LOF	amorph	1 (p.V92Sfs*38)	32461240
2023	Human Molecular Genetics	YWHAZ	14	New Disease Gene	L, F	Variant	LOF	hypomorph	1 (p.K49N)	36001342
2023	Neurology Genetics	ZDHHC15	15	New Disease Gene	L	Gene	N/A	N/A	N/A	34345675
2022	Genetics in Medicine	ZMYND8	13	Phenotypic Expansion	L	Gene	N/A	N/A	N/A	35916866
2023	American Journal of Human Genetics	2 genes (GTPBP1, GTPBP2)	17,16	New Disease Gene	L	Gene	N/A	N/A	N/A	38118446
2021	Science Advances	2 genes (SMARCA1, SMARCA5)	16, 14	New Disease Gene	L, H, O	Variant	LOF	amorph or strong hypomorph	2 (p.R592Q, p.del268-319 in SMARCA5)	33597246
2024	The Journal of Clinical Investigation	2 genes (PRPF19, U2AF2)	17, 17	New Disease Gene	L, H	Variant	LOF	some amorph, some hypomorph	3 (p.H273Tfs*37, p.G404S, p.L499P)	37962958
2020	Nature Genetics	11 genes (AGAP1, ATL1, DOCK11, MKL1, PTK2B, RABEP1, SEMA4A, SYNGAP1, TBC1D17, TENM1, ZDHHC15)	16, 15, 15, 9, 11, 10, 4, 12, 13, 15, 15	New Disease Gene	L	Gene	N/A	N/A	N/A	32989326
2022	Cell Reports	74 genes including GLRA2 (see manuscript for full list)	11 for GLRA2 (see manuscript for others)	Phenotypic Expansion	L, H, O	Variant	Some GOF, some LOF, some Mixed (GOF/LOF)	some amorph or strong hypomorph, some hypomoprh, some unclassified GOF, some mixed	79 (see manuscript, 30 variants with functional consequences)	35294868
Supplemental Table 1. List of recent manuscripts that used Drosophila melanogaster to address clinically relevant questions.
212 human genes and 449 variants were studied using flies in 134 manuscripts published over the past ~4.5 years (2020-early 2024). See main text and Figure 1 legend for the method we used to select the papers to include in this analysis.
*Clinical Relevance...New Disease Gene, Phenotypic Expansion, VUS Resolution, Known Disease Modeling
**Drosophila Methods...L: Loss of function, H: Humanization, O: Overexpression, F: Fly analogous variant.
***Muller's Morphs...Amorph, Hypomorph, Hypermorph, Antimorph, Neomorph.
Since Amorphic and strong Hypomophic alleles often behave very similarly in genetic studies, we documented strong LOF alleles as 'amorph or strong hypomorph' when additional molecular/biochemical studies were not conducted.
